# Supplementary material for: Stress Recovery Effects of Viewing Simulated Urban Parks: Landscape Types, Depressive Symptoms, and Gender Differences
Source: MDPI journal article supplement (doi:10.3390/land12010022), 2022-12-21
Supplement: s1 [file s1]

## Supplementary materials

**Table S1.** Descriptive Statistics and randomization checks.

| Variable                       | Greened Street | Lawn        | Plaza       | Forest      | Waterside   | F    | <i>p</i> |
|--------------------------------|----------------|-------------|-------------|-------------|-------------|------|----------|
| SCL <sub>T0</sub>              | 0.17 (0.37)    | 0.05 (0.35) | 0 (0.37)    | -0.1 (0.44) | 0 (0.37)    | 1.68 | 0.160    |
| Perceived Stress <sub>T0</sub> | 0.95 (0.7)     | 1.35 (0.91) | 1.23 (1.24) | 0.9 (1.07)  | 1.21 (1.27) | 0.82 | 0.512    |
| Chronic stress level           | 3.96 (1.54)    | 4.08 (1.52) | 3.8 (1.35)  | 3.84 (1.34) | 4 (1.35)    | 0.16 | 0.956    |
| Perceived physical health      | 4.48 (1.53)    | 4.08 (1.52) | 4.96 (1.33) | 5 (1.11)    | 4.56 (1.04) | 2.04 | 0.092    |
| Depressive symptoms (PHQ-9)    | 8.28 (5.37)    | 8.64 (4.86) | 7.28 (4.76) | 6.88 (4.52) | 7.44 (5.18) | 0.54 | 0.703    |
| $\Delta$ SCL <sub>stress</sub> | 0.58 (0.07)    | 0.49 (0.06) | 0.54 (0.05) | 0.69 (0.08) | 0.59 (0.07) | 1.22 | 0.308    |
| $\Delta$ PS <sub>stress</sub>  | 3.72 (0.37)    | 4.13 (0.34) | 4.28 (0.40) | 4.24 (0.36) | 4.54 (0.37) | 0.60 | 0.666    |

$$\Delta\text{SCL}_{\text{stress}} = \text{SCL}_{\text{T1}} - \text{SCL}_{\text{T0}}, \Delta\text{PS}_{\text{stress}} = \text{PS}_{\text{T1}} - \text{PS}_{\text{T0}}.$$

**Table S2.** Descriptive Statistics of the Outcome Variables.

| Environment    |    | M <sub>scl</sub> (SD) |              | M <sub>ps</sub> (SD) |             |
|----------------|----|-----------------------|--------------|----------------------|-------------|
|                |    | Women                 | Men          | Women                | Men         |
| Greened Street | N  | 12                    | 13           | 12                   | 12          |
|                | T0 | -0.1 (0.36)           | 0.1 (0.37)   | 0.93 (0.79)          | 0.97 (0.63) |
|                | T1 | 0.6 (0.15)            | 0.56 (0.26)  | 5.2 (1.78)           | 4.15 (1.73) |
|                | T2 | 0.27 (0.22)           | 0.53 (0.25)  |                      |             |
|                | T3 | 0.28 (0.26)           | 0.51 (0.26)  | 2.6 (1.95)           | 2.85 (2)    |
| Lawn           | N  | 13                    | 12           | 13                   | 12          |
|                | T0 | 0.05 (0.05)           | 0.31 (0.27)  | 1.5 (0.95)           | 1.2 (0.89)  |
|                | T1 | 0.64 (0.16)           | 0.67 (0.17)  | 6.23 (1.62)          | 4.68 (1.73) |
|                | T2 | 0.22 (0.36)           | 0.47 (0.31)  |                      |             |
|                | T3 | 0.19 (0.37)           | 0.45 (0.29)  | 1.63 (0.8)           | 2.27 (1.34) |
| Plaza          | N  | 13                    | 12           | 13                   | 12          |
|                | T0 | -0.02 (0.37)          | 0.13 (0.32)  | 0.76 (1.07)          | 1.73 (1.27) |
|                | T1 | 0.54 (0.26)           | 0.65 (0.24)  | 5.43 (2.34)          | 5.42 (1.58) |
|                | T2 | 0.18 (0.35)           | 0.43 (0.35)  |                      |             |
|                | T3 | 0.01 (0.32)           | 0.36 (0.36)  | 1.8 (1.47)           | 1.76 (1.36) |
| Forest         | N  | 12                    | 11           | 13                   | 12          |
|                | T0 | -0.15 (0.51)          | -0.05 (0.37) | 0.71 (0.65)          | 1.11 (1.39) |
|                | T1 | 0.53 (0.27)           | 0.63 (0.17)  | 5.53 (2.02)          | 5.09 (1.47) |
|                | T2 | 0.14 (0.39)           | 0.33 (0.23)  |                      |             |
|                | T3 | -0.02 (0.38)          | 0.23 (0.23)  | 1.11 (0.96)          | 1.04 (1.03) |
| Waterside      | N  | 12                    | 12           | 12                   | 13          |
|                | T0 | -0.05 (0.47)          | 0.06 (0.25)  | 1.27 (1.39)          | 1.16 (1.2)  |
|                | T1 | 0.55 (0.23)           | 0.63 (0.18)  | 5.29 (1.91)          | 5.93 (1.51) |
|                | T2 | 0.21 (0.23)           | 0.34 (0.26)  |                      |             |
|                | T3 | 0.19 (0.3)            | 0.23 (0.24)  | 1.25 (1.54)          | 2 (1.46)    |

Notes. T0 = baseline; T1 = stressor (pre-recover); T2 = minute 5 of recover; T3 = minute 10 of recover. M<sub>scl</sub> = Mean skin conductance level; M<sub>ps</sub> = Mean perceived stress; SD = standard deviation.

**Table S3.** Results of regression models testing the interaction between environmental condition and depressive symptoms (PHQ-9 sum score) on the outcome measures.

| SCL (T3)                                | Step1 |       |       | Step2 |       |       | Step3  |       |       | Step4  |       |       | Step5  |       |       |
|-----------------------------------------|-------|-------|-------|-------|-------|-------|--------|-------|-------|--------|-------|-------|--------|-------|-------|
|                                         | B     | SE    | p     | B     | SE    | p     | B      | SE    | p     | B      | SE    | p     | B      | SE    | p     |
| Constant                                | 0.246 | 0.026 | 0.000 | 0.153 | 0.034 | 0.000 | 0.327  | 0.056 | 0.000 | 0.330  | 0.057 | 0.000 | 0.330  | 0.057 | 0.000 |
| Stressor level (centered)               | 0.896 | 0.119 | 0.000 | 0.841 | 0.114 | 0.000 | 0.839  | 0.109 | 0.000 | 0.841  | 0.109 | 0.000 | 0.869  | 0.111 | 0.000 |
| Male                                    |       |       |       | 0.188 | 0.049 | 0.000 | 0.183  | 0.046 | 0.000 | 0.181  | 0.047 | 0.000 | 0.189  | 0.047 | 0.000 |
| Condition (Greened street as reference) |       |       |       |       |       |       |        |       |       |        |       |       |        |       |       |
| Lawn                                    |       |       |       |       |       |       | -0.144 | 0.072 | 0.049 | -0.144 | 0.073 | 0.051 | -0.145 | 0.074 | 0.052 |
| Plaza                                   |       |       |       |       |       |       | -0.226 | 0.072 | 0.002 | -0.228 | 0.072 | 0.002 | -0.235 | 0.072 | 0.002 |
| Forest                                  |       |       |       |       |       |       | -0.299 | 0.073 | 0.000 | -0.303 | 0.074 | 0.000 | -0.290 | 0.074 | 0.000 |
| Waterside                               |       |       |       |       |       |       | -0.197 | 0.073 | 0.008 | -0.199 | 0.073 | 0.007 | -0.204 | 0.073 | 0.006 |
| PHQ (centered)                          |       |       |       |       |       |       |        |       |       | -0.003 | 0.005 | 0.596 | -0.010 | 0.010 | 0.314 |
| Treatment x PHQ                         |       |       |       |       |       |       |        |       |       |        |       |       |        |       |       |
| Lawn x PHQ                              |       |       |       |       |       |       |        |       |       |        |       |       | 0.002  | 0.014 | 0.885 |
| Plaza x PHQ                             |       |       |       |       |       |       |        |       |       |        |       |       | 0.003  | 0.015 | 0.864 |
| Forest x PHQ                            |       |       |       |       |       |       |        |       |       |        |       |       | 0.029  | 0.015 | 0.065 |
| Waterside x PHQ                         |       |       |       |       |       |       |        |       |       |        |       |       | 0.008  | 0.014 | 0.555 |
| R <sup>2</sup>                          | 0.319 |       |       | 0.394 |       |       | 0.479  |       |       | 0.480  |       |       | 0.500  |       |       |
| $\Delta R^2$                            |       |       |       | 0.074 |       | 0.000 | 0.085  |       | 0.001 | 0.001  |       | 0.596 | 0.020  |       | 0.373 |

**Table S4.** Results of regression models testing the interaction between environmental condition and depressive symptoms (PHQ-9 sum score) on the outcome measures.

| Perceived stress (T3)                   | Step1 |       |       | Step2 |       |       | Step3  |       |       | Step4  |       |       | Step5  |       |       |
|-----------------------------------------|-------|-------|-------|-------|-------|-------|--------|-------|-------|--------|-------|-------|--------|-------|-------|
|                                         | B     | SE    | p     | B     | SE    | p     | B      | SE    | p     | B      | SE    | p     | B      | SE    | p     |
| Constant                                | 1.828 | 0.129 | 0.000 | 1.614 | 0.181 | 0.000 | 2.695  | 0.295 | 0.000 | 2.594  | 0.288 | 0.000 | 2.497  | 0.286 | 0.000 |
| Stressor level (centered)               | 0.240 | 0.071 | 0.001 | 0.256 | 0.072 | 0.001 | 0.303  | 0.067 | 0.000 | 0.263  | 0.067 | 0.000 | 0.226  | 0.066 | 0.001 |
| Male                                    |       |       |       | 0.434 | 0.259 | 0.097 | 0.449  | 0.239 | 0.063 | 0.469  | 0.232 | 0.046 | 0.437  | 0.229 | 0.059 |
| Condition (Greened street as reference) |       |       |       |       |       |       |        |       |       |        |       |       |        |       |       |
| Lawn                                    |       |       |       |       |       |       | -1.022 | 0.381 | 0.008 | -0.990 | 0.369 | 0.008 | -0.758 | 0.369 | 0.042 |
| Plaza                                   |       |       |       |       |       |       | -1.160 | 0.380 | 0.003 | -1.034 | 0.371 | 0.006 | -0.909 | 0.366 | 0.014 |
| Forest                                  |       |       |       |       |       |       | -1.832 | 0.379 | 0.000 | -1.681 | 0.371 | 0.000 | -1.587 | 0.367 | 0.000 |
| Waterside                               |       |       |       |       |       |       | -1.383 | 0.382 | 0.000 | -1.261 | 0.373 | 0.001 | -1.129 | 0.368 | 0.003 |
| PHQ (centered)                          |       |       |       |       |       |       |        |       |       | 0.071  | 0.024 | 0.004 | 0.169  | 0.052 | 0.001 |
| Treatment x PHQ                         |       |       |       |       |       |       |        |       |       |        |       |       |        |       |       |
| Lawn x PHQ                              |       |       |       |       |       |       |        |       |       |        |       |       | -0.219 | 0.074 | 0.004 |
| Plaza x PHQ                             |       |       |       |       |       |       |        |       |       |        |       |       | -0.079 | 0.074 | 0.288 |
| Forest x PHQ                            |       |       |       |       |       |       |        |       |       |        |       |       | -0.121 | 0.076 | 0.116 |
| Waterside x PHQ                         |       |       |       |       |       |       |        |       |       |        |       |       | -0.070 | 0.071 | 0.324 |
| R <sup>2</sup>                          | 0.085 |       |       | 0.105 |       |       | 0.264  |       |       | 0.314  |       |       | 0.368  |       |       |
| $\Delta R^2$                            |       |       |       | 0.021 |       | 0.097 | 0.158  |       | 0.000 | 0.051  |       | 0.004 | 0.053  |       | 0.058 |
